# Supplementary material for: Rapid preparation of Ag/CoO/rGO composites for electrochemical detection of hydrogen peroxide
Source: Royal Society of Chemistry journal article supplement (doi:10.1039/d3nj03681b), 2023-01-01
Supplement: d3nj03681b1.pdf [file d3nj03681b1.pdf]

# Rapid Preparation of Ag/CoO/rGO Composite for Electrochemical Detection of Hydrogen Peroxid

*He Song<sup>a</sup>, Jie He<sup>a</sup>, Peng Pan<sup>a\*</sup>, Jun Liu<sup>b\*</sup>, Zhengchun Yang<sup>a</sup>, Haodong Shen<sup>a</sup>, Peifeng  
Zeng<sup>a</sup>*

<sup>a</sup>School of Integrated Circuit Science and Engineering, Advanced Materials and  
Printed Electronics Center, Tianjin Key Laboratory of Film Electronic &  
Communication Devices, Tianjin University of Technology, Tianjin 300384, China

<sup>b</sup>School of Electrical Engineering and Automation, Tianjin University of Technology,  
Tianjin 300384, China

\*Peng Pan: [panpeny@163.com](mailto:panpeny@163.com)

\*Jun Liu: [cloudlj@163.com](mailto:cloudlj@163.com)

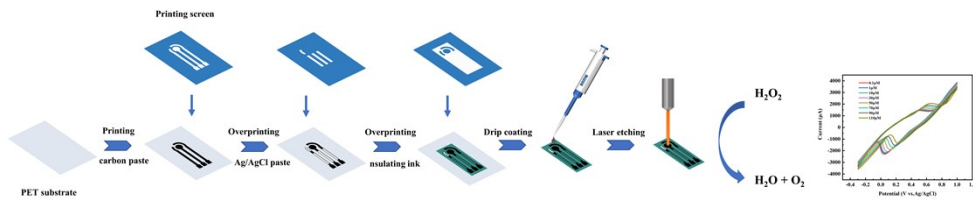

**Fig.S1.** H<sub>2</sub>O<sub>2</sub> detection scheme using the Ag / CoO /rGO/SPE

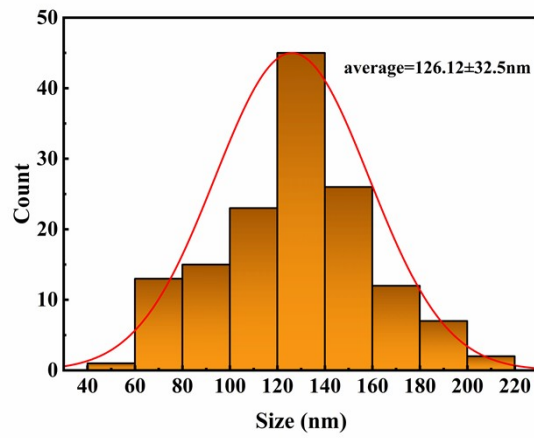

**Fig.S2.** Ag/CoO/rGO aperture size

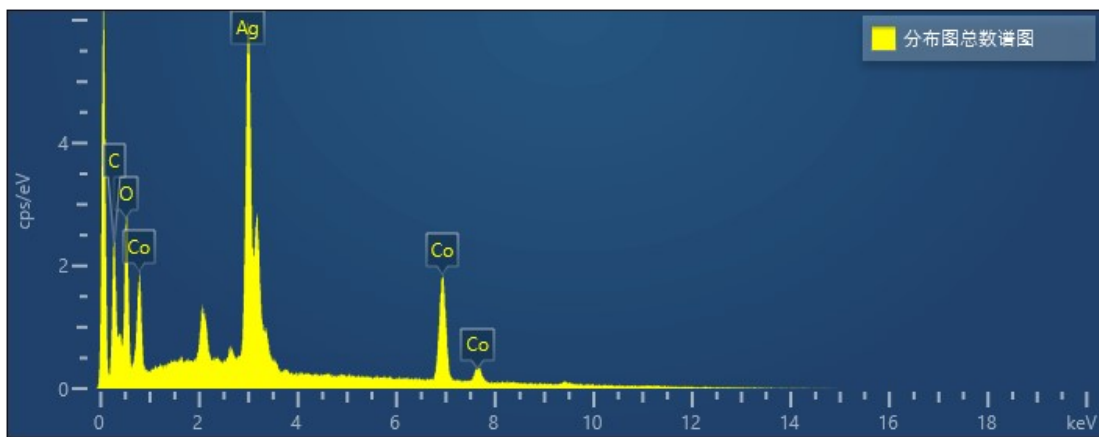

**Fig.S3.** Total spectrum of Ag/CoO/rGO distribution

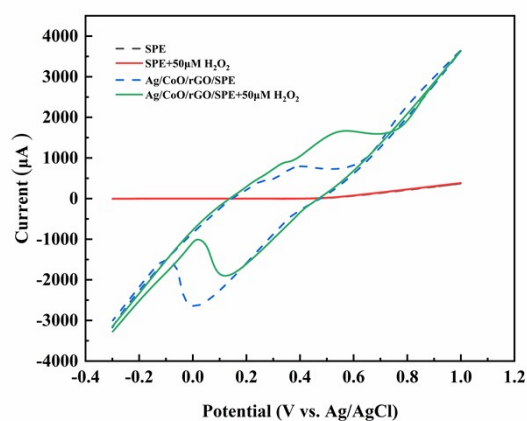

**Fig.S4.** CV curves of different electrodes (dotted line: blank NaOH solution, Solid Line:50 μM H<sub>2</sub>O<sub>2</sub> NaOH solution).

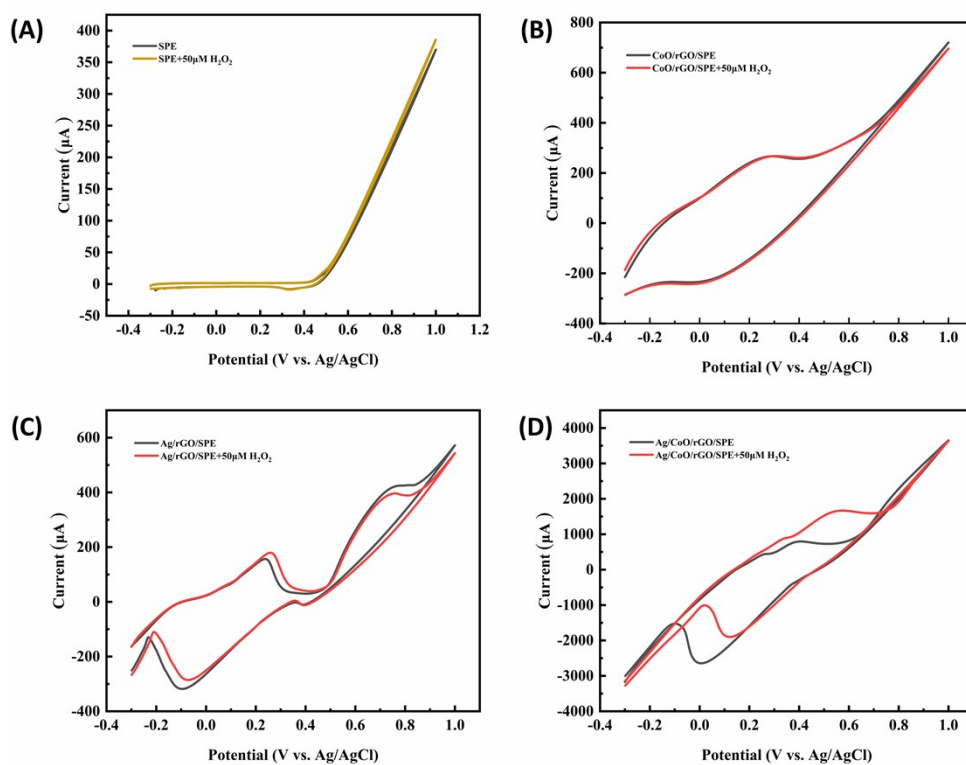

**Fig.S5.** CV curves of (A)SPE , (B)CoO/rGO/SPE , (C)Ag/rGO/SPE and (D) Ag/CoO/rGO/SPE in 50 μM H<sub>2</sub>O<sub>2</sub> NaOH solution.

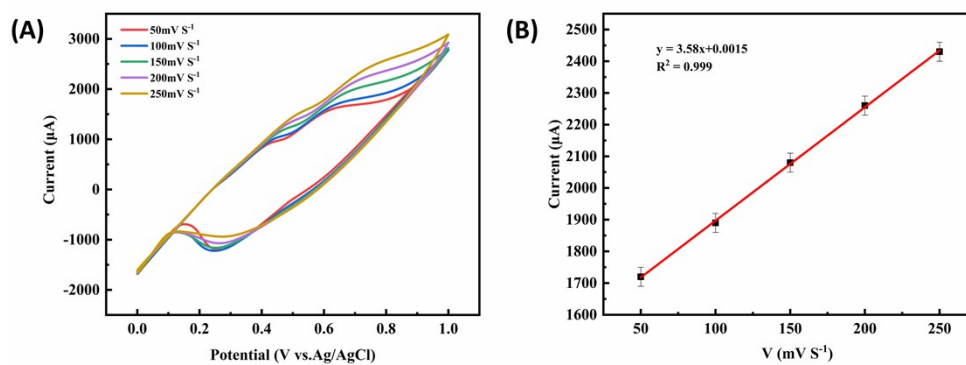

**Fig.S6.**(A)CV curves of the Ag/ Co<sub>3</sub>O<sub>4</sub>/rGO/SPE at different scanning rates in 0.1 mol/L NaOH and (B) its linear fitting graph.

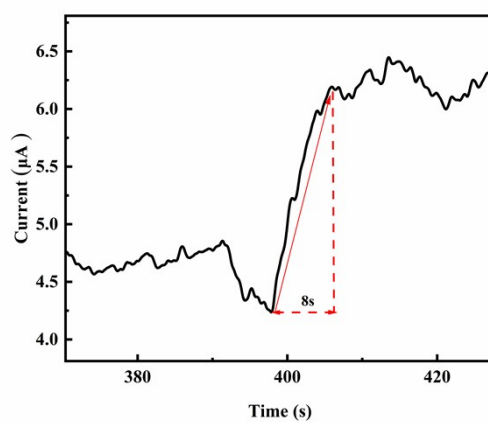

**Fig.S7.** Ag/ CoO/rGO/SPE response time

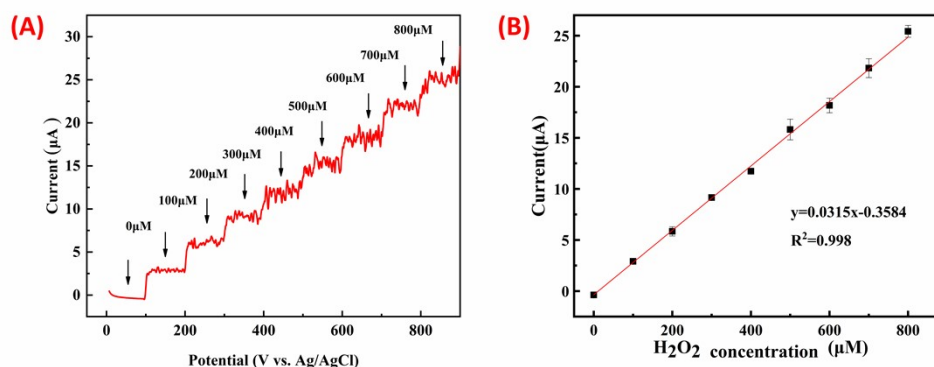

**Fig.S8.** (A) i-t curves of Ag/CoO/rGO/SPE in artificial urine species with continuous addition of H<sub>2</sub>O<sub>2</sub> (0-800 μM) at 0.2 V applied potential; (B) Calibration curve for i-t curve of (A)

The limit of detection (LOD) of the sensor can be determined using the

following equation:  $cL = \frac{xL \cdot b}{m} = K \cdot Sb/m$ . The LOD is 0.185 μM. In the equation above, as per the guidelines provided by the International Union of Pure and Applied Chemistry (IUPAC), "m" represents the slope of the linear range correction curve, "b" stands for the average background current of the blank solution, and "Sb" denotes the standard deviation of the background current of the blank solution. According to the recommended value "K = 3," the measurement was performed 11 times.
